# Supplementary material for: Comparison of reducing sugar content, sensory traits, and fatty acids and volatile compound profiles of the longissimus thoracis among Korean cattle, Holsteins, and Angus steers
Source: PubMed Central journal article supplement (PMC6325407; doi:10.5713/ajas.18.0065), 2018-07-26
Supplement: ajas-18-0065-supplmentary.pdf [file ajas-18-0065-supplmentary.pdf]

1 **Supplementary Table 1.** Fatty acid contents (g/100g meat)<sup>1)</sup> in the *longissimus thoracis* from  
 2 Korean cattle (KC), Holstein (HO), and Angus (AN) steers (n=12)

| Fatty acid                                       | KC                | HO                | AN                | SEM  | p-value |
|--------------------------------------------------|-------------------|-------------------|-------------------|------|---------|
| C12:0                                            | 0.02 <sup>a</sup> | 0.01 <sup>b</sup> | 0.00 <sup>c</sup> | 0.00 | 0.001   |
| C13:0                                            | 0.01              | 0.01              | 0.01              | 0.00 | 0.61    |
| C14:0                                            | 0.77 <sup>a</sup> | 0.34 <sup>b</sup> | 0.15 <sup>c</sup> | 0.05 | 0.001   |
| C14:1                                            | 0.27 <sup>a</sup> | 0.12 <sup>b</sup> | 0.03 <sup>c</sup> | 0.02 | 0.001   |
| C15:0                                            | 0.04 <sup>a</sup> | 0.03 <sup>b</sup> | 0.02 <sup>b</sup> | 0.00 | 0.001   |
| C16:0                                            | 5.62 <sup>a</sup> | 2.51 <sup>b</sup> | 1.27 <sup>c</sup> | 0.33 | 0.001   |
| C16:1                                            | 0.97 <sup>a</sup> | 0.43 <sup>b</sup> | 0.17 <sup>c</sup> | 0.06 | 0.001   |
| C17:0                                            | 0.06              | 0.08              | 0.10              | 0.01 | 0.31    |
| C17:1                                            | 0.09 <sup>a</sup> | 0.06 <sup>b</sup> | 0.06 <sup>b</sup> | 0.00 | 0.001   |
| C18:0                                            | 2.11 <sup>a</sup> | 1.05 <sup>b</sup> | 0.76 <sup>c</sup> | 0.11 | 0.001   |
| C18:1t                                           | 0.04 <sup>a</sup> | 0.02 <sup>b</sup> | 0.02 <sup>b</sup> | 0.00 | 0.005   |
| C18:1n9                                          | 8.33 <sup>a</sup> | 3.55 <sup>b</sup> | 1.90 <sup>c</sup> | 0.51 | 0.001   |
| C18:2                                            | 0.30 <sup>a</sup> | 0.22 <sup>b</sup> | 0.23 <sup>b</sup> | 0.01 | 0.003   |
| C18:3                                            | 0.01              | 0.01              | 0.01              | 0.00 | 0.35    |
| C18:2 <sub>9c11t</sub> + C18:2 <sub>10t12c</sub> | 0.07 <sup>a</sup> | 0.03 <sup>b</sup> | 0.02 <sup>b</sup> | 0.01 | 0.001   |
| C20:1                                            | 0.05 <sup>a</sup> | 0.02 <sup>b</sup> | 0.01 <sup>b</sup> | 0.00 | 0.001   |
| C20:3                                            | 0.03 <sup>a</sup> | 0.03 <sup>a</sup> | 0.02 <sup>b</sup> | 0.00 | 0.01    |
| C20:4                                            | 0.03 <sup>c</sup> | 0.06 <sup>a</sup> | 0.04 <sup>b</sup> | 0.00 | 0.001   |
| SFA <sup>2)</sup>                                | 8.63 <sup>a</sup> | 4.02 <sup>b</sup> | 2.30 <sup>c</sup> | 0.48 | 0.001   |
| USFA <sup>3)</sup>                               | 10.2 <sup>a</sup> | 4.53 <sup>b</sup> | 2.50 <sup>c</sup> | 0.61 | 0.001   |
| MUFA <sup>4)</sup>                               | 9.75 <sup>a</sup> | 4.19 <sup>b</sup> | 2.18 <sup>c</sup> | 0.59 | 0.001   |
| PUFA <sup>5)</sup>                               | 0.43 <sup>a</sup> | 0.34 <sup>b</sup> | 0.31 <sup>b</sup> | 0.02 | 0.002   |

3 SEM, standard error of the mean.

4 <sup>1)</sup> Individual fatty acid content per meat (g/100g meat) was calculated as described in  
 5 Materials and Methods.

6 <sup>2)</sup> SFA (saturated fatty acids) = C12:0 + C13:0 + C14:0 + C15:0 + C16:0 + C17:0 +  
 7 C18:0.

8 <sup>3)</sup> USFA (unsaturated fatty acids) = C14:1 + C16:1 + C17:1 + C18:1t + C18:1c + C20:1.

9 <sup>4)</sup> MUFA (monounsaturated fatty acids) = C14:1 + C16:1 + C17:1 + C18:1t + C18:1c +  
 10 C20:1.

11 <sup>5)</sup> PUFA (polyunsaturated fatty acids) = C18:2 + C18:3 + C20:3 + C20:4 + C18:2<sub>9c11t</sub> +  
 12 C18:2<sub>10t12c</sub>.

13 <sup>a-c</sup> Means with different letters within the same row differ (p < 0.05).

14 **Supplementary Table 2.** Pearson correlation coefficients among chemical composition, physico-chemical parameters, and sensory traits of  
 15 pooled *longissimus thoracis* from Korean cattle (KC), Holstein (HO), and Angus (AN) steers (n=36)

| Item                               | Crude protein | Crude fat | CIE <i>L</i> * | CIE <i>a</i> * | CIE <i>b</i> * | pH    | Shear force | Flavor   | Tenderness | Juiciness | Overall acceptance |
|------------------------------------|---------------|-----------|----------------|----------------|----------------|-------|-------------|----------|------------|-----------|--------------------|
| <i>Chemical composition</i>        |               |           |                |                |                |       |             |          |            |           |                    |
| Moisture                           | 0.82***       | -0.98***  | -0.09          | 0.10           | -0.24          | 0.08  | 0.53***     | -0.71*** | -0.82***   | -0.79***  | -0.68***           |
| Crude protein                      | –             | -0.88***  | -0.04          | -0.05          | -0.14          | -0.14 | 0.32        | -0.71*** | -0.54***   | -0.55***  | -0.67***           |
| Crude fat                          |               | –         | 0.05           | -0.05          | 0.23           | -0.08 | -0.48**     | 0.71***  | 0.76***    | 0.73***   | 0.67***            |
| <i>Physico-chemical parameters</i> |               |           |                |                |                |       |             |          |            |           |                    |
| CIE <i>L</i> *                     |               |           | –              | 0.25           | 0.49**         | 0.26  | -0.03       | 0.14     | 0.13       | 0.08      | 0.14               |
| CIE <i>a</i> *                     |               |           |                | –              | 0.75***        | 0.30  | 0.07        | 0.30     | -0.01      | 0.06      | 0.29               |
| CIE <i>b</i> *                     |               |           |                |                | –              | 0.16  | -0.03       | 0.41*    | 0.34*      | 0.38*     | 0.40*              |
| pH                                 |               |           |                |                |                | –     | 0.14        | 0.23     | 0.03       | 0.12      | 0.26               |
| Shear force                        |               |           |                |                |                |       | –           | -0.27    | -0.45**    | -0.39*    | -0.30              |
| <i>Sensory traits</i>              |               |           |                |                |                |       |             |          |            |           |                    |
| Flavor                             |               |           |                |                |                |       |             | –        | 0.80***    | 0.84***   | 0.99***            |
| Tenderness                         |               |           |                |                |                |       |             |          | –          | 0.96***   | 0.81***            |
| Juiciness                          |               |           |                |                |                |       |             |          |            | –         | 0.85***            |

16 \*  $p < 0.05$ ; \*\*  $p < 0.01$ ; \*\*\*  $p < 0.001$ .

17

18 **Supplementary Table 3.** Pearson correlation coefficients of chemical composition and physico-chemical parameters with fatty acid  
 19 composition (% of fat) of pooled *longissimus thoracis* from Korean cattle (KC), Holstein (HO), and Angus (AN) steers (n=36)

| Item                               | C14:0    | C16:0    | C16:1    | C18:0    | C18:1n9  | C18:2    | SFA    | USFA   | MUFA     | PUFA     |
|------------------------------------|----------|----------|----------|----------|----------|----------|--------|--------|----------|----------|
| <i>Chemical composition</i>        |          |          |          |          |          |          |        |        |          |          |
| Moisture                           | -0.49**  | -0.55*** | -0.56*** | 0.73***  | -0.70*** | 0.77***  | 0.39*  | -0.39* | -0.76*** | 0.79***  |
| Crude protein                      | -0.32    | -0.28    | -0.35*   | 0.50**   | -0.56*** | 0.51***  | 0.36*  | -0.35* | -0.59*** | 0.56***  |
| Crude fat                          | 0.48**   | 0.50**   | 0.53***  | -0.71*** | 0.67***  | -0.72*** | -0.39* | 0.38*  | 0.73***  | -0.75*** |
| <i>Physico-chemical parameters</i> |          |          |          |          |          |          |        |        |          |          |
| pH                                 | -0.52*** | -0.56*** | -0.61*** | 0.66***  | -0.28    | 0.56***  | 0.16   | -0.16  | -0.43**  | 0.51**   |
| Shear force                        | -0.49**  | -0.63*** | -0.47**  | 0.45**   | -0.12    | 0.47**   | -0.10  | 0.11   | -0.23    | 0.46**   |

20 \*  $p < 0.05$ ; \*\*  $p < 0.01$ ; \*\*\*  $p < 0.001$ .
